# Supplementary material
Source: MDPI journal article supplement (https://www.mdpi.com/2673-8023/3/1/18)
Supplement: s1 [file s1 › micro-2098210-supplementary.pdf]

## Structural Consequences of Post-Synthetic Modification of $\text{Cu}_2\text{P}_3\text{I}_2$

### Supplementary Information

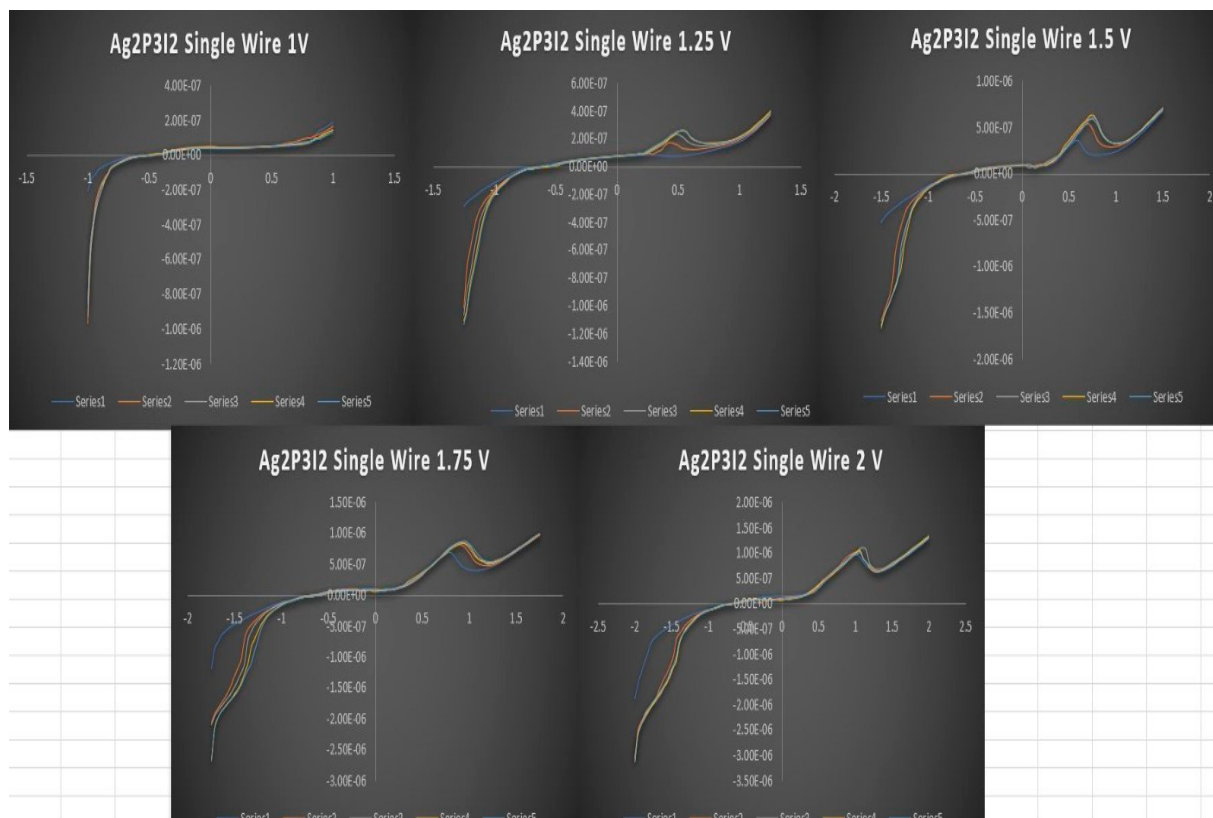

**Figure S1.** Shifting redox peak initially observed in linear scans of the IV curve of post-synthetically modified  $\text{Ag}_2\text{P}_3\text{I}_2$  “single-wire” devices.

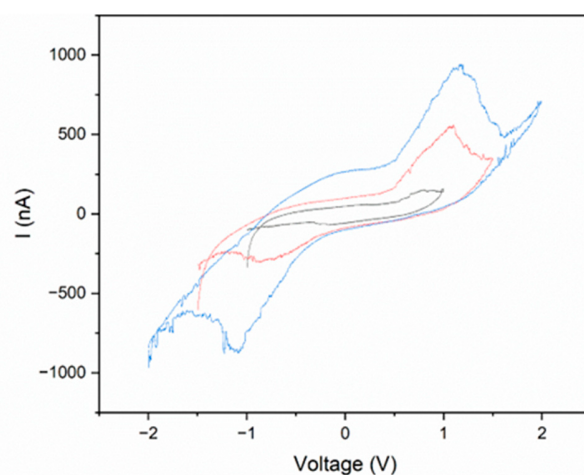

**Figure S2.** Redox peak shifting continued to be observed in cyclic voltammetry which corroborates redox activity by revealing a reduction peak.

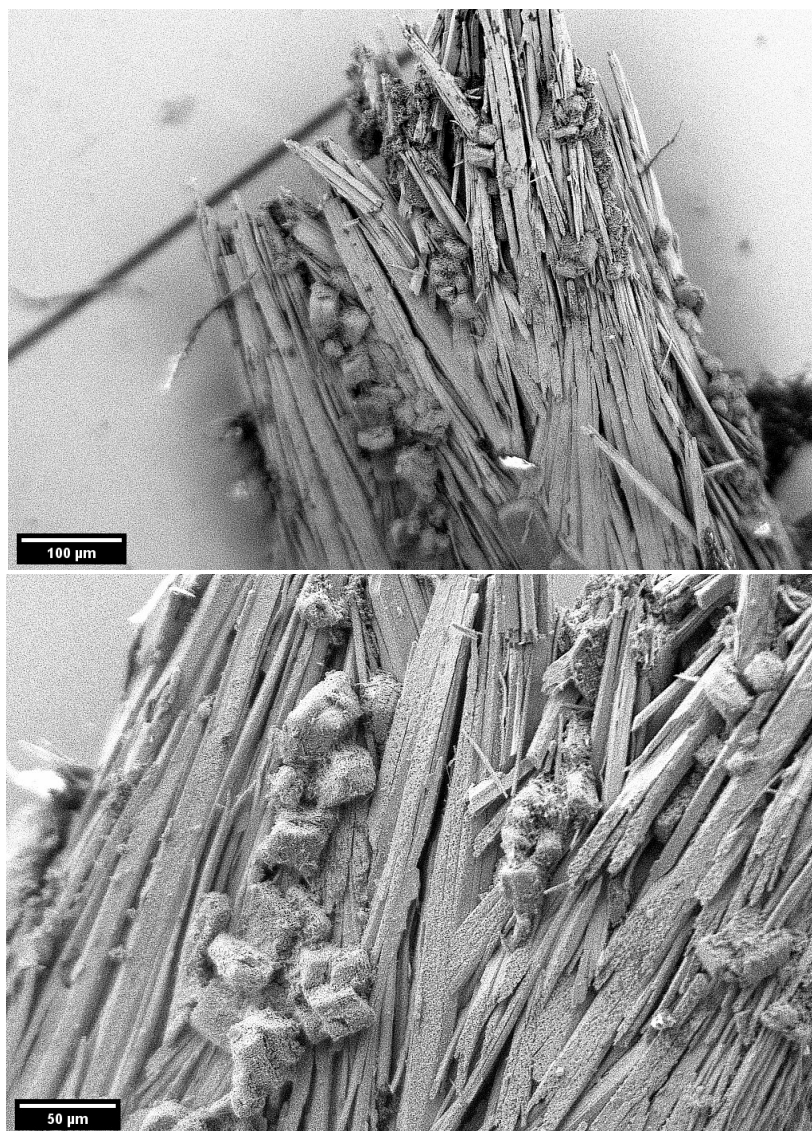

**Figure S3.** SEM images of post-synthetically modified  $\text{Ag}_2\text{P}_3\text{I}_2$  exhibiting splintering along the principle axis.
